# Supplementary material for: Encapsulation of lipophilic fragrance by polymerization of the intermediate aqueous phase of an oil-in-water-in-oil (O/W/O) double emulsion
Source: Royal Society of Chemistry journal article supplement (doi:10.1039/c9py00528e), 2019-01-01

**Encapsulation of lipophilic fragrance by Polymerization of the intermediate aqueous  
phase of an oil-in-water-in-oil (O/W/O) double emulsion**

Margot Stasse<sup>a-b-c</sup>, Tiphaine Ribaut<sup>c</sup>, Véronique Schmitt <sup>\*b</sup> and Valérie Héroguez <sup>\*a</sup>

*<sup>a</sup>Laboratoire de Chimie des Polymères Organiques, CNRS, UMR 5629, Bordeaux, 16 Avenue  
Pey-Berland, F-33607 Pessac, France*

*<sup>b</sup>Centre de Recherche Paul Pascal, UMR 5031 University of Bordeaux CNRS 115 avenue du  
Dr Albert Schweitzer 33600 Pessac, France*

*<sup>c</sup>Takasago Europe Perfumery Laboratory 12 rue Torricelli 75017 PARIS, France*

\*CORRESPONDING AUTHOR :

Valérie Héroguez, Université de Bordeaux, LCPO, UMR 5629, F-33600 Pessac, France.

CNRS, LCPO, UMR 5629, F-33600 Pessac, France

Tel: +33 (0) 5 40 00 22 28

Fax: +33 (0) 5 40 00 84 87

Email: [heroguez@enscbp.fr](mailto:heroguez@enscbp.fr)

Véronique Schmitt, Centre de Recherche Paul Pascal, UMR 5031 University of Bordeaux  
CNRS 115 avenue du Dr Albert Schweitzer 33600 Pessac, France

Tel : +33 (0)5 84 56 67

Fax : +33 (0)5 84 56 00

Email : [veronique.schmitt@crpp.cnrs.fr](mailto:veronique.schmitt@crpp.cnrs.fr)

Table S1: Composition of fragrance A. T<sub>b</sub> : Boiling Temperature.

| <b>Perfumery name</b> | <b>Chemical name</b>                           | <b>wt %</b> | <b>Molecular Weight (g/mol)</b> | <b>LogP</b> | <b>T<sub>b</sub> (°C)</b> |
|-----------------------|------------------------------------------------|-------------|---------------------------------|-------------|---------------------------|
| ALDEHYDE C12 LAURIC   | Dodecanal                                      | 5           | 184.32                          | 5.07        | 257                       |
| TH LINALOOL           | 3,7-dimethyloctan-3-ol                         | 15          | 158.28                          | 3.52        | 155                       |
| HEDIONE               | methyl 2-(3-oxo-2-pentylcyclopentyl)acetate    | 20          | 226.32                          | 2.91        | 110<br>(0.2 mmHg)         |
| METHYL HEXYL KETONE   | 2-Octanone                                     | 10          | 128.22                          | 2.44        | 173                       |
| BOISAMBRENE           | Ethoxymethyl-cyclododecyl ether                | 5           | 242.40                          | 5.48        | 94 (1 mmHg)               |
| DIMETHYL ANTHRANILATE | Methyl N-methylantranilate                     | 5           | 165,19                          | 2.66        | 256                       |
| DECALACTONE           | 5-Hexyloxolan-2-one                            | 10          | 170,25                          | 2.36        | 270                       |
| CLONAL                | Dodecane nitrile                               | 5           | 181.32                          | 4.90        | 277                       |
| EUCALYPTOL            | 1,3,3-triméthyl-2-oxabicyclo[2,2,2]octane      | 5           | 154.25                          | 2.91        | 176                       |
| ISO BORNYL ACETATE    | 1,7,7-Trimethylbicyclo[2.2.1]hept-2-yl acetate | 20          | 196.29                          | 4.04        | 225                       |

Table S2: Composition of fragrance B. T<sub>b</sub> : Boiling Temperature.

| Perfumery name           | Chemical name                                         | wt % | Molecular Weight (g/mol) | LogP | T <sub>b</sub> (°C) |
|--------------------------|-------------------------------------------------------|------|--------------------------|------|---------------------|
| HEXENYL ACETATE CIS 3    | cis-3-Hexenyl acetate                                 | 5    | 142.20                   | 2.34 | 167                 |
| TRIPLAL                  | 2,4-dimethylcyclohex-3-ene-1-carbaldehyde             | 5    | 138.21                   | 2.36 | 196                 |
| EUGENOL                  | 2-methoxy-4-(2-propenyl)-phenol                       | 5    | 164.20                   | 2.40 | 254                 |
| CYCLACET                 | Tricyclododecenyl Acetate                             | 10   | 192.26                   | 2.88 | 295                 |
| CITRAL                   | 3,7-dimethylocta-2,6-dienal                           | 5    | 152.24                   | 2.95 | 229                 |
| CITRONELLOL 950          | 3,7-Dimethyloct-6-en-1-ol                             | 5    | 156.27                   | 3.25 | 225                 |
| ALLYL HEPTANOATE         | prop-2-enyl heptanoate                                | 5    | 170.25                   | 3.60 | 210                 |
| DAMASCONE DELTA          | 1-(2,6,6-trimethyl-1-cyclohex-3-enyl)but-2-en-1-one   | 2    | 192.30                   | 3.62 | 256                 |
| IONONE BETA              | 4-(2,6,6-trimethyl-1-cyclohexene-1-yl)-3-butene-2-one | 5    | 192.30                   | 3.71 | 259.5               |
| ALDEHYDE C11 UNDECYLENIC | 10-undecenal                                          | 5    | 168.28                   | 4.05 | 223                 |
| VERDOX                   | (2-tert-butylcyclohexyl) acetate                      | 38   | 198.31                   | 4.06 | 221                 |
| ISORALDEINE 70           | 1-(2,6,6-trimethyl-2-cyclohexen-1-yl)penten-3-one     | 5    | 206.33                   | 4.23 | 285                 |
| HEXYL CINN ALD           | 2-Benzylideneoctanal                                  | 5    | 216.32                   | 5.00 | 318                 |

Equations S1: Expressions of the corrective factors

$$f = 1,017 - 1,334\left(\frac{r}{v^3}\right) + 1,477\left(\frac{r}{v^3}\right)^2 - 0,471\left(\frac{r}{v^3}\right)^3 \quad \text{for } \left(\frac{r}{v^3}\right) < 0,4 \quad (1)$$

$$f = 0,9 - 0,71\left(\frac{r}{v^3}\right) + 0,4245\left(\frac{r}{v^3}\right)^2 \quad \text{for } \left(\frac{r}{v^3}\right) < 0,4 \quad (2)$$

$$v = \frac{m}{\rho} \quad (3)$$

Figure S1: Comparison of the globules' size of the reverse emulsion prepared with 25w% and 50w% of HEMA in the water phase

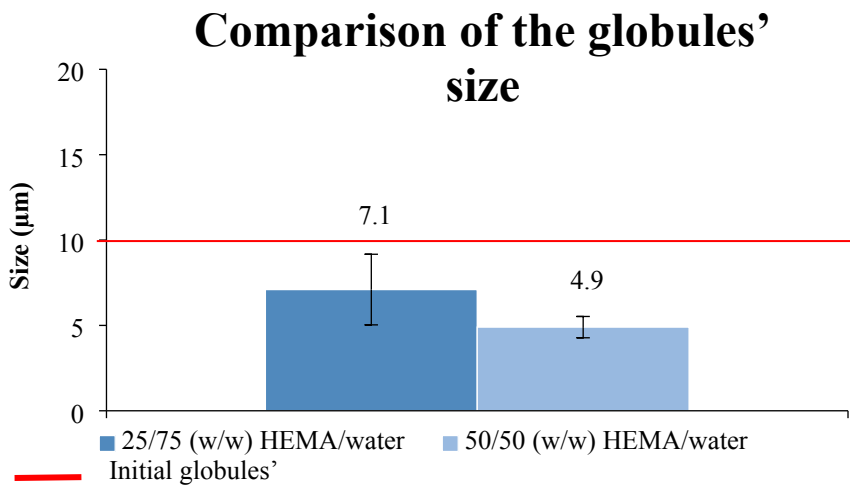

Figure S2: DSC of OEGMA macromonomer

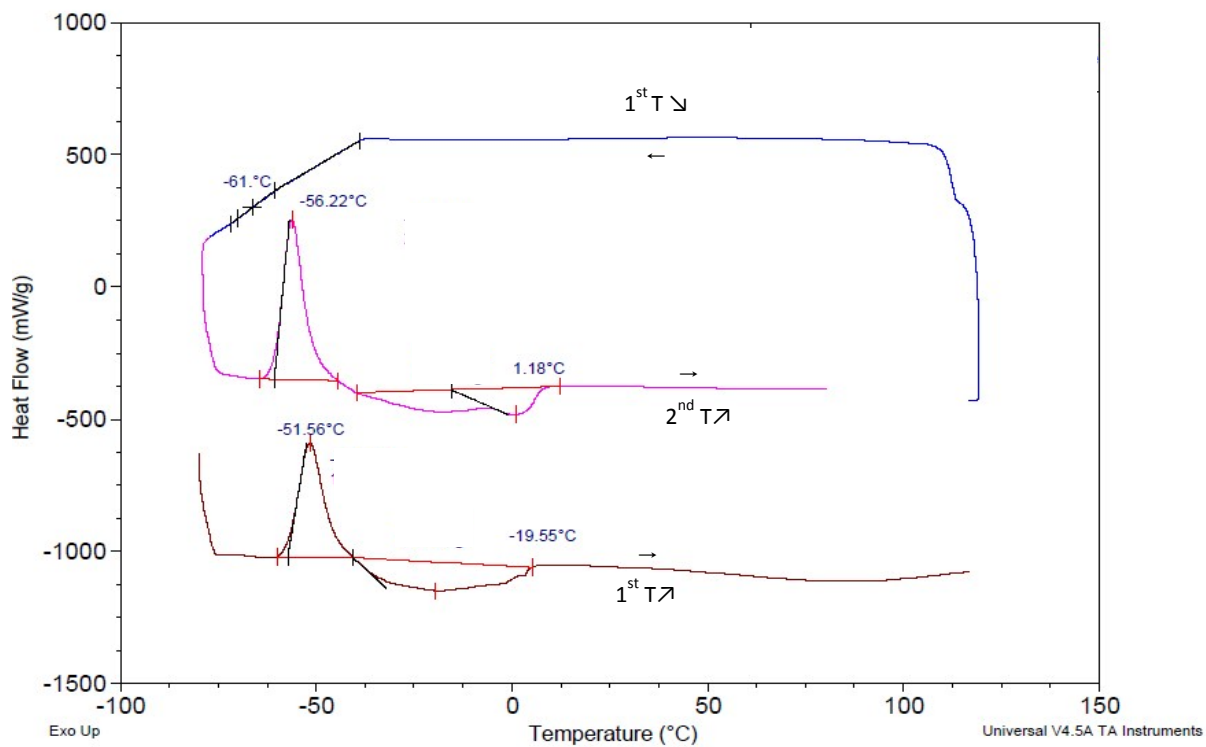

Figure S3: Observation by optical microscopy of Collapse in OEGMA/B, OEGMA/A and MAM/B O/W/O polymerized emulsions in IPM

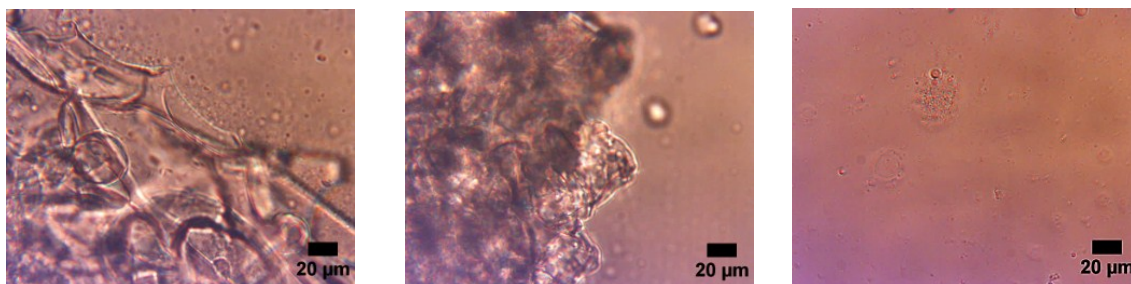

Figure S4: DSC of polymerized a) OEGMA/B, b) OEGMA/A and c) MAM/B in O/W/O emulsions

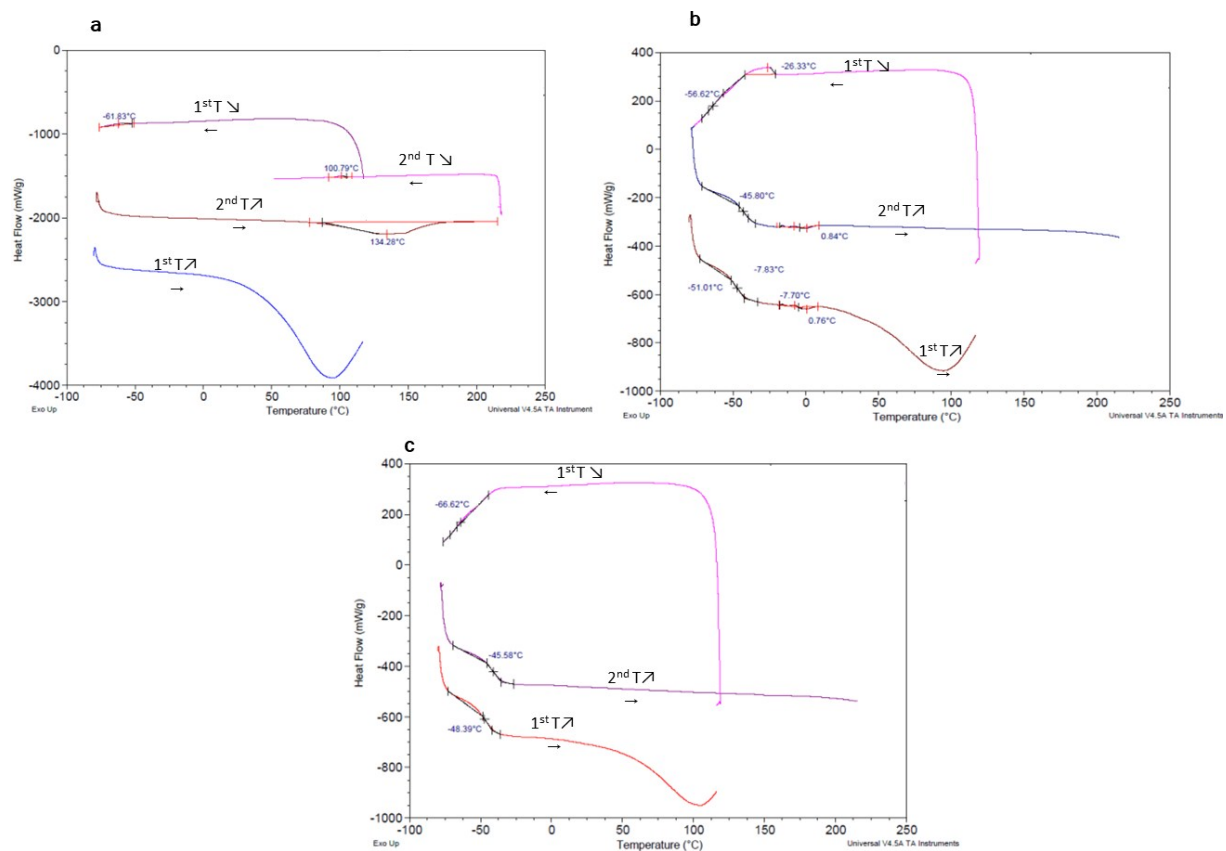

Supplement: c9py00528e1.pdf [file c9py00528e1.pdf]
